# Supplementary material for: Amino-bridged attapulgite@perovskite nanocomposites: the role of bridge linkage in their optical properties and stabilities
Source: Royal Society of Chemistry journal article supplement (doi:10.1039/d3qi00863k), 2023-01-01
Supplement: d3qi00863k1.pdf [file d3qi00863k1.pdf]

## Supporting Information

### **Amino-Bridged Attapulgite-Perovskite Nanocomposites: The Role of Bridged Linkage to Optical Property and Stability**

Lei Qiu,<sup>a,b,c</sup> Mengyu Guan,<sup>a</sup> Wei Wang,<sup>a</sup> Maxim S. Molokeev,<sup>d</sup> Sergey P. Polyutov,<sup>d</sup>  
Zhigao Dai,<sup>\*,a,c</sup> Guogang Li<sup>\*,a,b</sup>

<sup>a</sup> Faculty of Materials Science and Chemistry, China University of Geosciences, 388 Lumo Road, Wuhan 430074, P. R. China.

<sup>b</sup> Zhejiang Institute, China University of Geosciences, Hangzhou 311305, P. R. China.

<sup>c</sup> Shenzhen Institute, China University of Geosciences, Shenzhen, 518052, P. R. China.

<sup>d</sup> International Research Center of Spectroscopy and Quantum Chemistry-IRC SQC, Siberian Federal University, Krasnoyarsk, 660041, Russia.

E-mail: ggli@cug.edu.cn; daizhigao@cug.edu.cn

## Results and Discussion

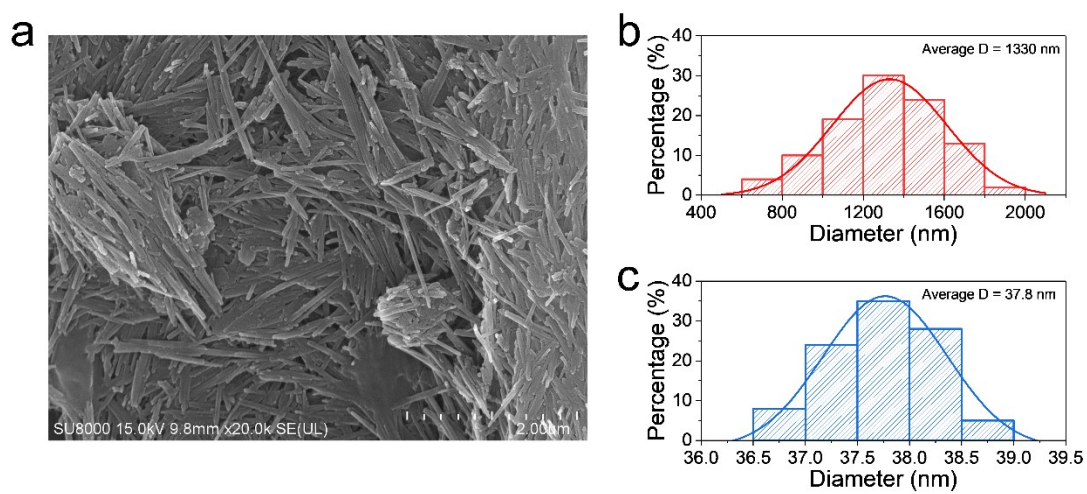

**Figure S1** (a) SEM image of pristine ATP NRs. The (b) vertical and (c) lateral size distribution of pristine ATP NRs.

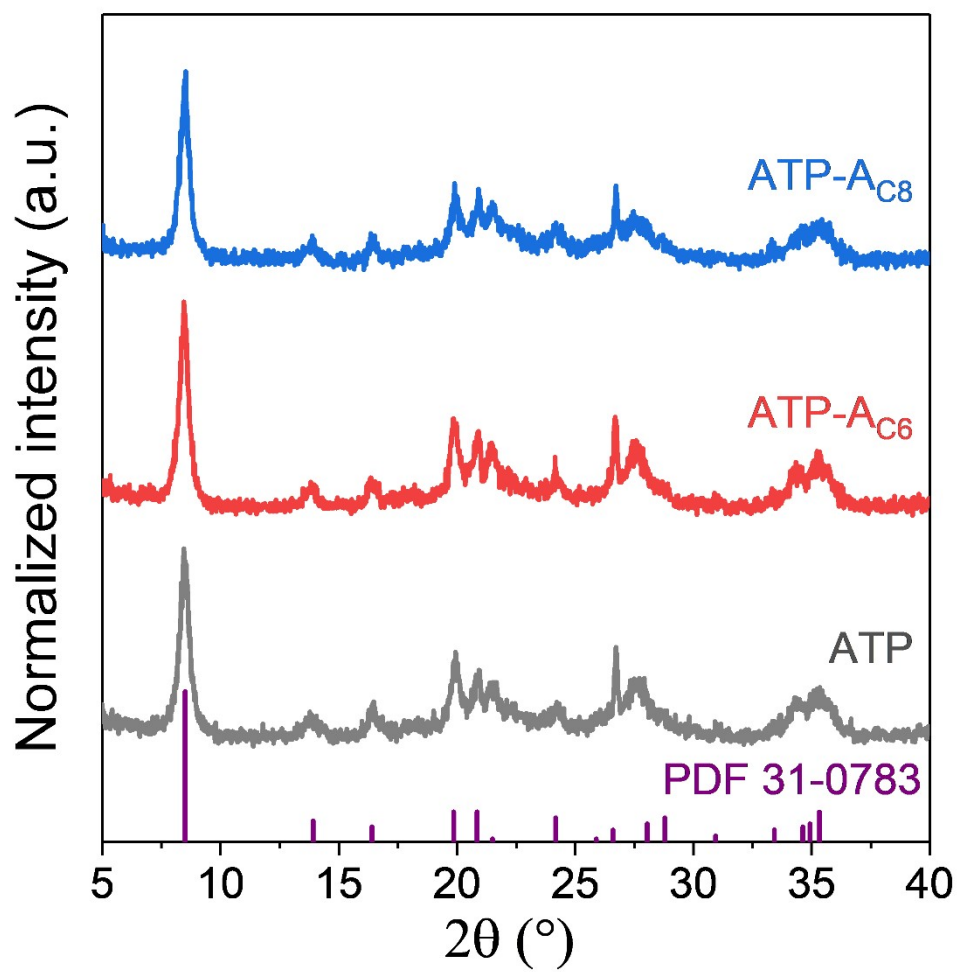

**Figure S2** XRD patterns of ATP, ATP-A<sub>C6</sub> and ATP-A<sub>C8</sub>.

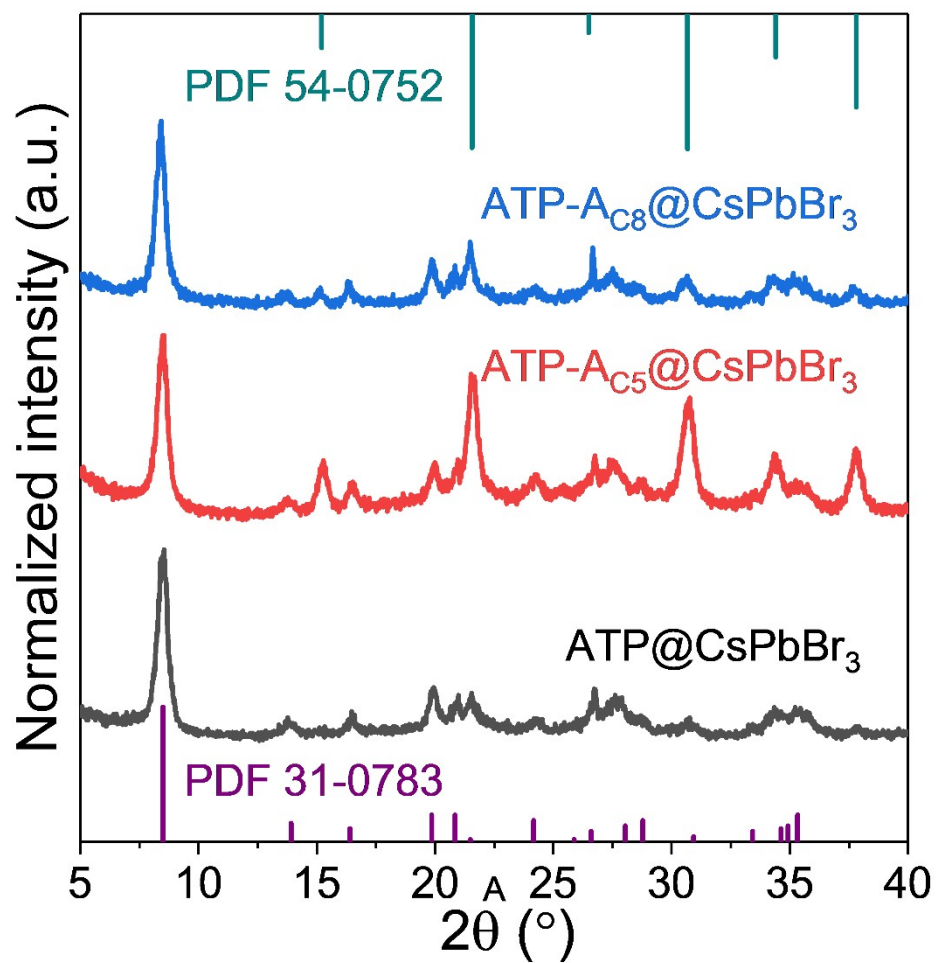

**Figure S3** XRD patterns of ATP@CsPbBr<sub>3</sub>, ATP-A<sub>C6</sub>@CsPbBr<sub>3</sub> and ATP-A<sub>C8</sub>@CsPbBr<sub>3</sub> nanocomposites.

a

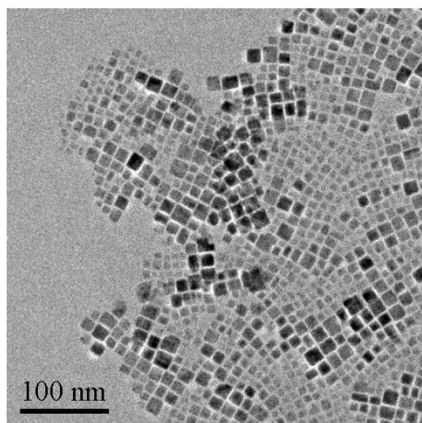

b

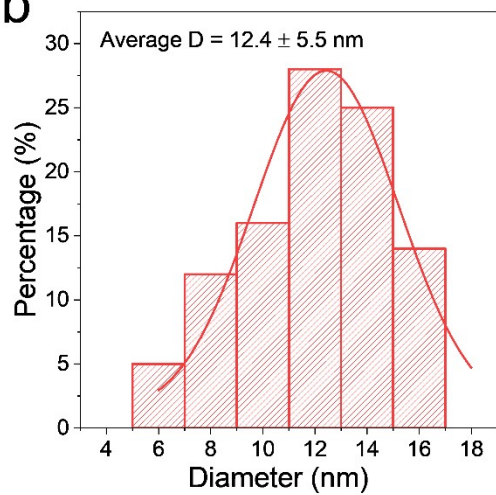

**Figure S4** (a) TEM image and (b) size distribution of pure CsPbBr<sub>3</sub> NCs.

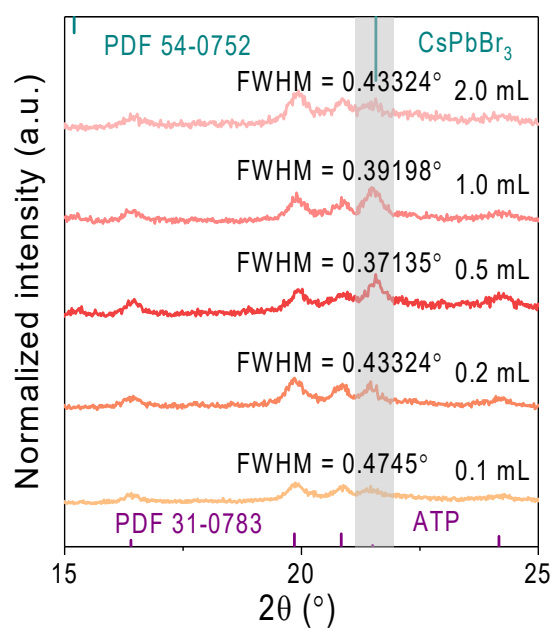

**Figure S5** The FWHM values of XRD diffraction peak at  $2\theta = 21.57^\circ$  with different dosage of APTMS.

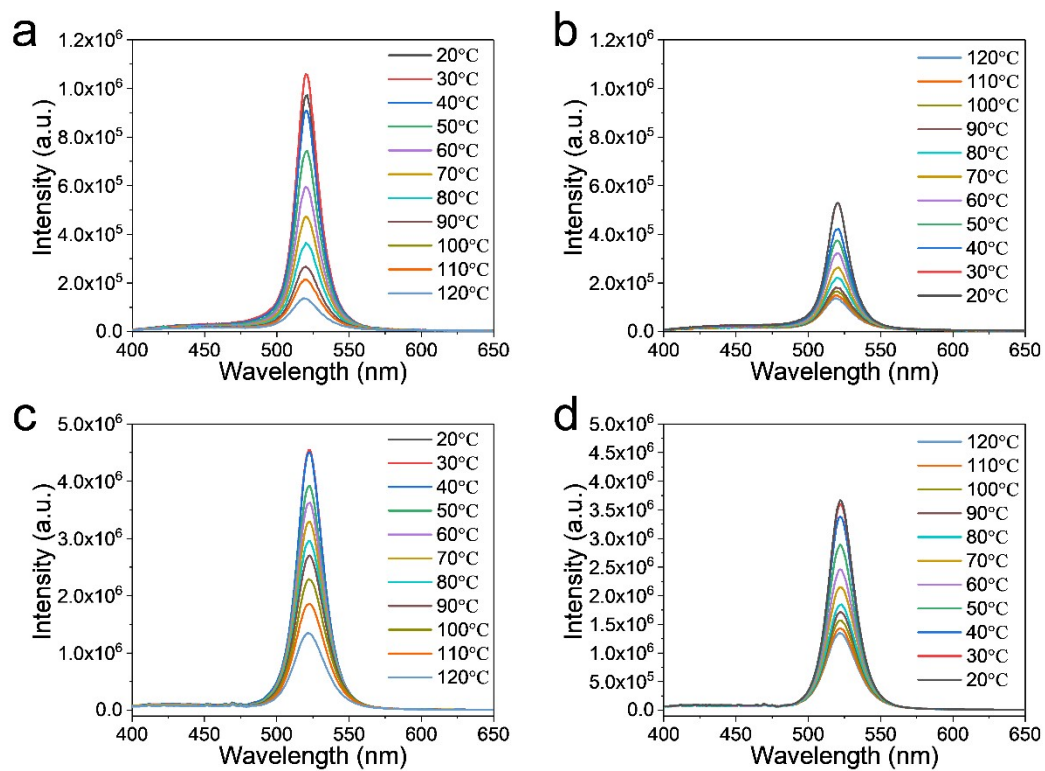

**Figure S6** PL spectra of ATP@CsPbBr<sub>3</sub> nanocomposite during the (a) heating and (b) cooling processes. PL spectra of ATP-Ac<sub>6</sub>@CsPbBr<sub>3</sub> nanocomposite during the (c) heating and (d) cooling processes.

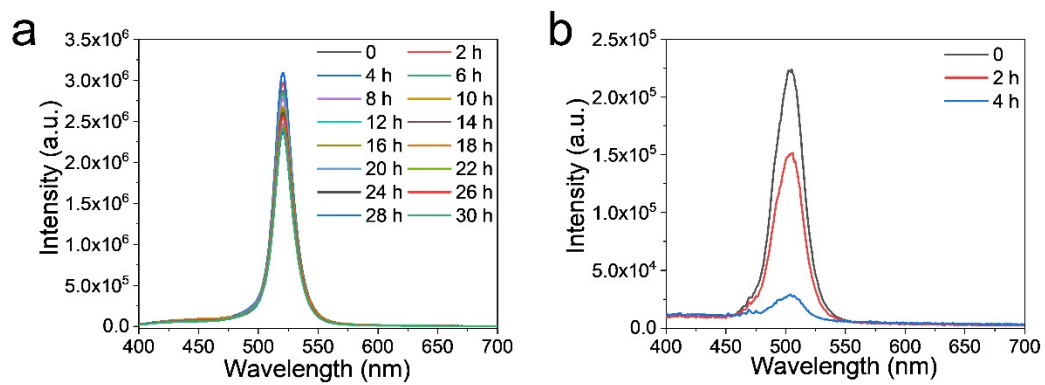

**Figure S7** PL spectra of ATP-Ac<sub>6</sub>@CsPbBr<sub>3</sub> and ATP@CsPbBr<sub>3</sub> nanocomposites under continuous exposure of UV light.



**Table S1** PL decay characteristics of ATP@CsPbBr<sub>3</sub>, ATP-A<sub>C6</sub>@CsPbBr<sub>3</sub> and ATP-A<sub>C8</sub>@CsPbBr<sub>3</sub> nanocomposites.

| Samples                                  | A <sub>1</sub> | τ <sub>1</sub> /ns | A <sub>2</sub> | τ <sub>2</sub> /ns | τ <sub>avg</sub> /ns |
|------------------------------------------|----------------|--------------------|----------------|--------------------|----------------------|
| ATP@CsPbBr <sub>3</sub>                  | 590.87         | 10.99              | 455.78         | 34.60              | 27.7                 |
| ATP-A <sub>C6</sub> @CsPbBr <sub>3</sub> | 915.02         | 8.71               | 320.42         | 63.21              | 47.8                 |
| ATP-A <sub>C8</sub> @CsPbBr <sub>3</sub> | 778.91         | 11.74              | 292.65         | 57.62              | 41.5                 |

**Table S2** Performance parameters of LED device fabricated by ATP-A<sub>C6</sub>@CsPbBr<sub>3</sub> nanocomposite and pure CsPbBr<sub>3</sub> NCs.

| Green source                             | luminous efficiency<br>(lm/W) | CRI | CIE x | CIE y | CCT<br>(K) |
|------------------------------------------|-------------------------------|-----|-------|-------|------------|
| ATP-A <sub>C6</sub> @CsPbBr <sub>3</sub> | 38                            | 78  | 0.37  | 0.36  | 3981       |
| CsPbBr <sub>3</sub>                      | 34                            | 54  | 0.30  | 0.34  | 6967       |
